# Supplementary material
Source: PubMed Central journal article supplement (PMC5686546)
Supplement: EMBJ-36-3274-s001.pdf [file EMBJ-36-3274-s001.pdf]

## Appendix file

### Table of content

|                    | Page |
|--------------------|------|
| Appendix Figure S1 | 2    |
| Appendix Figure S2 | 3    |
| Appendix Table O   | 4    |
| Appendix Table O   | 6    |

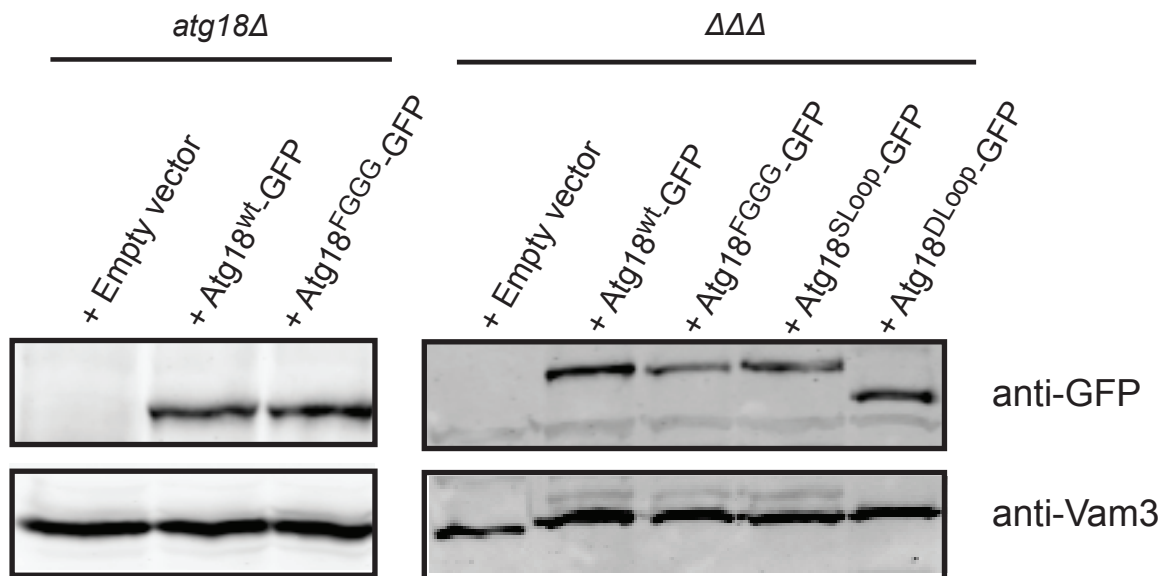

**Appendix Figure G1.** Expression levels of Atg18wt-GFP and its mutant variants, resulting from the pRS316-based expression in *atg18Δ* and  $\Delta\Delta\Delta$  cells. Cells were grown as in Fig. 2, lysed with TCA and glass beads, and analysed by SDS-PAGE and Western blotting against GFP and the vacuolar integral membrane protein Vam3, which served a loading control.

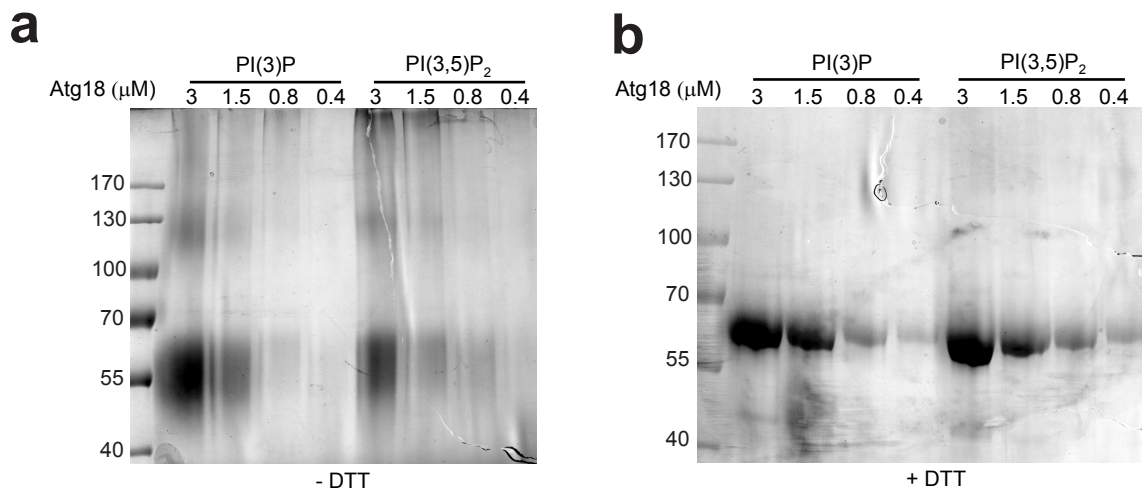

**Appendix Figure S2.** Cross-linking of Atg18 at various concentrations of protein. 3  $\mu\text{M}$  to 0.4  $\mu\text{M}$  of Atg18 were incubated with 1 mg/mL of liposomes containing 5% PI3P or PI(3,5)P<sub>2</sub>. Cross-linking was performed as in Fig. 9.

**5 ddYbXJl Table G1: Yeast strains used**

| Number | Strain                                           | Genotype                                                               | Source                  |
|--------|--------------------------------------------------|------------------------------------------------------------------------|-------------------------|
| NG25   | BJ3505                                           | <i>MATa pep4::HIS3 prb1-Δ1.6R lys2-208 trp1-Δ101 ura3-52 gal2 can</i>  | E. Jones                |
| NG60   | BJ3505 <i>atg18Δ</i>                             | BJ3505; <i>atg18::natNT2</i>                                           | Zieger and Mayer (2012) |
| NG149  | BJ3505 <i>atg18Δ atg21Δ hsv2Δ</i>                | BJ3505; <i>atg18::natNT2; atg21::loxP-loxP; hsv2::loxP-KANMX-loxP</i>  | This study              |
| NG49   | BJ3505 <i>atg18Δ</i> Atg18-GFP                   | NG60 + <i>pRS316-Atg18-3HA-GFP</i>                                     | This study              |
|        | BJ3505 <i>atg18Δ</i> Atg18FGGG-GFP               | NG60 + <i>pRS316-Atg18FGGG-3HA-GFP</i>                                 | This study              |
| NG140  | BJ3505 <i>atg18Δ atg21Δ hsv2Δ</i> Atg18-GFP      | NG149 + <i>pRS316-Atg18-3HA-GFP</i>                                    | This study              |
| NG172  | BJ3505 <i>atg18Δ atg21Δ hsv2Δ</i> Atg18FGGG-GFP  | NG149 + <i>pRS316-Atg18FGGG-3HA-GFP</i>                                | This study              |
| NG176  | BJ3505 <i>atg18Δ atg21Δ hsv2Δ</i> Atg18SLoop-GFP | NG149 + <i>pRS316-Atg18SLoop-3HA-GFP</i>                               | This study              |
| TN124  | Pho8 Δ60                                         | Mat a, <i>ura3-52, leu2-3,-112, trp1-1, pho8::pho8Δ60, pho13::LEU2</i> | (Noda et al., 1995)     |
| NG240  | Pho8Δ60 <i>atg1Δ</i>                             | TN124 <i>atg1::KAN</i>                                                 | This study              |
| NG241  | Pho8Δ60 <i>atg18Δ</i>                            | TN124 <i>atg18::NAT + pRS316-Atg18</i>                                 | This study              |
| NG242  | Pho8Δ60 <i>atg18Δ</i> Atg18                      | NG241 + <i>pRS316-Atg18</i>                                            | This study              |
| NG243  | Pho8Δ60 <i>atg18Δ</i> Atg18FGGG                  | NG241 + <i>pRS316-Atg18FGGG</i>                                        | This study              |
| NG244  | Pho8Δ60 <i>atg18Δ</i> Atg18SLoop                 | NG241 + <i>pRS316-Atg18SLoop</i>                                       | This study              |
| NG245  | Pho8Δ60 <i>atg18Δ</i> Atg18DLoop                 | NG241 + <i>pRS316-Atg18DLoop</i>                                       | This study              |
| NG250  | Pho8Δ60 <i>atg18Δ atg21Δ</i>                     | NG241 <i>atg21::KAN</i>                                                | This study              |
| NG251  | Pho8Δ60 <i>atg18Δ atg21Δ</i> Atg18               | NG250 + <i>pRS316-Atg18</i>                                            |                         |
| NG252  | Pho8Δ60 <i>atg18Δ atg21Δ</i> Atg18 Atg21         | NG250 + <i>pRS316-Atg18 + pRS314-Atg21</i>                             | This study              |

|       |                                                                 |                                                                                                   |                                     |
|-------|-----------------------------------------------------------------|---------------------------------------------------------------------------------------------------|-------------------------------------|
| NG253 | Pho8Δ60 <i>atg18Δ</i><br><i>atg21Δ</i> Atg18<br>Atg21SLoop      | NG250 + <i>pRS316-Atg18</i> + <i>pRS314-Atg21SLoop</i>                                            | This study                          |
| NG255 | Pho8Δ60 <i>atg18Δ</i><br><i>atg21Δ</i> Atg18SLoop<br>Atg21      | NG250 + <i>pRS316-Atg18SLoop</i> +<br><i>pRS314-Atg21</i>                                         | This study                          |
| NG256 | Pho8Δ60 <i>atg18Δ</i><br><i>atg21Δ</i> Atg18SLoop<br>Atg21SLoop | NG250 + <i>pRS316-Atg18SLoop</i> +<br><i>pRS314-Atg21SLoop</i>                                    | This study                          |
| NG257 | BJ <i>fab1Δ</i> Atg18-GFP                                       | NG25 <i>fab1::NAT pRS316-Atg18-3HA-GFP</i>                                                        | This study                          |
| NG258 | SEY <i>vps34Δ</i> (PHY102)<br>Atg18-GFP                         | MATa <i>suc2-Δ9 ura3-52 leu2-3 his3-Δ200 trp1Δ911 lys 2-801 vps34Δ::TRP1 pRS316-Atg18-3HA-GFP</i> | (Herman and Emr 1990)<br>This study |

## 5 ddYbXJl Table G2: PCR primers used

KO Primers are for amplification of the deletion cassette from the pUG6 plasmid (loxP-KanMX-LoxP) (Güldener *et al*, 1996). Atg18 F and R primers are for amplification of full-length Atg18 for ligation into the pEXP5-NT/TOPO vector (Invitrogen)

| Name                  | Sequence 5' – 3'                                                                                      |
|-----------------------|-------------------------------------------------------------------------------------------------------|
| atg21-KO-F            | GAC AAT TCC ACT CCT TTG GAT TTG AAA TAG ACA GAT AGA AAA<br>GGA TCA GCT GAA GCT TCG TAC GC             |
| atg21-KO-R            | GAA TAC GTA CAA TAT CTA TTA AGA TTA TGA AAA CTG CAC ATA<br>TGC AGC ATA GGC CAC TAG TGG ATC TG         |
| atg21 KO ctrl F       | AGG AGC GTG AGC TGC AGA AAG                                                                           |
| atg21 KO ctrl R       | CCC TCT TTA GCA ATT CAC ACG                                                                           |
| hsv2-KO-F             | CTG GAA AGG CAG CGA TTA TTA GAG GAC AAC TAT AAG CAT<br>ACA TAA CTA GCA GAT GCG TAC GCT GCA GGT CGA C  |
| hsv2-KO-R             | TTG TAC GTA AAT GCA CAC TTT CTC TAT ACA TAT ATA TAT ATT<br>TAT ATT CAT GTT AAT CGA TGA ATT CGA GCT CG |
| hsv2 KO ctrl F        | CGG GGG CTA TTG TTA AAG GG                                                                            |
| hsv2 KO ctrl R        | CTC GCA TGA CGC CTA CCG                                                                               |
| atg18-F               | ATG TCT GAT TCA TCA CCT AC                                                                            |
| atg18-R               | TCA ATC CAT CAA GAT GGA ATA C                                                                         |
| atg18_cterm-F         | GCC AGT ACT TGG CGG TTA C                                                                             |
| atg18 terminator<br>R | GCA AAA GGA TAG ATT ATA CGC AGG AG                                                                    |
| atg2 KO ctrl F        | CCG AAA TGG AAC AGC AAG TGG                                                                           |
| atg2 KO ctrl R        | CCT CTA TAA TGG CAT CTT CCC CC                                                                        |
| atg2 promotor F       | CGA CTC ACT ATA GGG CGA ATT GGA GCT CCA CCG CGG TGA<br>GCG GGT TGT ACT GTT TGC T                      |
| atg21 C term R        | TTA CGC ATA GTC AGG AAC ATC GTA TGG GTA TGT AAA TTT ATT<br>ATT TTT AGT CAG CAC ACA TTC                |
| atg21 C term F        | TAC CCA TAC GAT GTT CCT GAC TAT GCG TAA TGC ATA TGT<br>GCA GTT TTC ATA ATC TT                         |
| atg21 terminator<br>R | ACT AAA GGG AAC AAA AGC TGG GTA CCG GGC CCC CCA TCG<br>TTT TCT TAA ACA TTG                            |
